# Supplementary material for: Phase behaviour and structure of zwitanionic mixtures of perfluorocarboxylates and tetradecyldimethylamine oxide—dependence on chain length of the perfluoro surfactant
Source: Royal Society of Chemistry journal article supplement (doi:10.1039/c1sm05618b), 2011-01-01
Supplement: c1sm05618b.pdf [file c1sm05618b.pdf]

## Supporting Information

### cmc-Measurements: Determination of Interaction Parameter

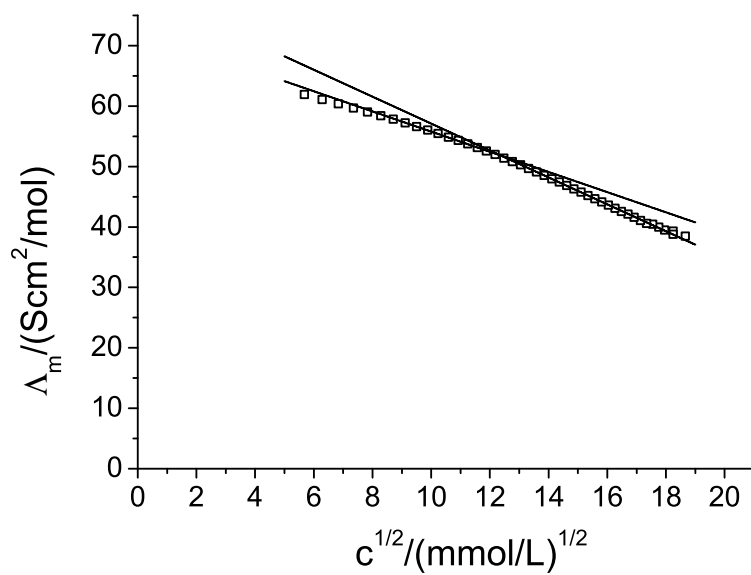

Figure S1: Determination of the cmc by conductivity measurements on the system TDMAO- $\text{C}_5\text{F}_{11}\text{CO}_2\text{Li}$  at  $\alpha(\text{TDMAO}) = 0$  □

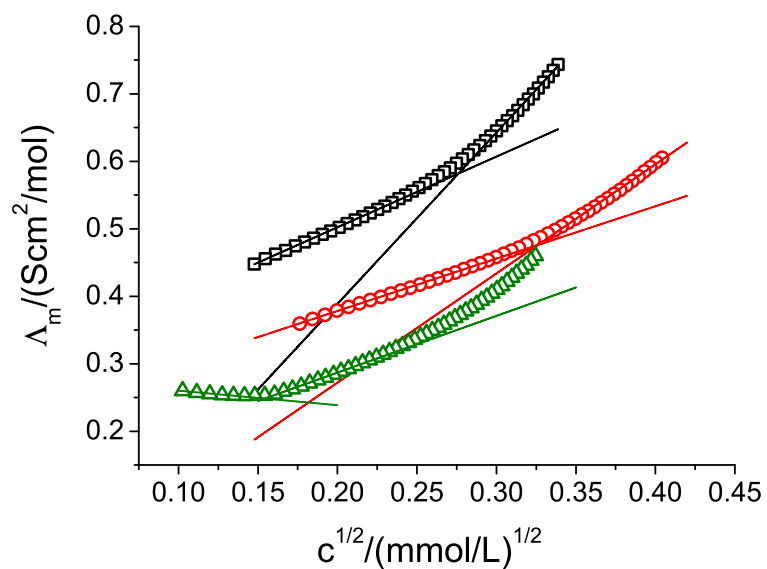

Figure S2: Determination of the cmc by conductivity measurements on the system TDMAO- $\text{C}_5\text{F}_{11}\text{CO}_2\text{Li}$  at  $\alpha(\text{TDMAO}) = 0.1$   $\square$ ,  $\alpha(\text{TDMAO}) = 0.3$   $\circ$ , and  $\alpha(\text{TDMAO}) = 0.5$   $\triangle$

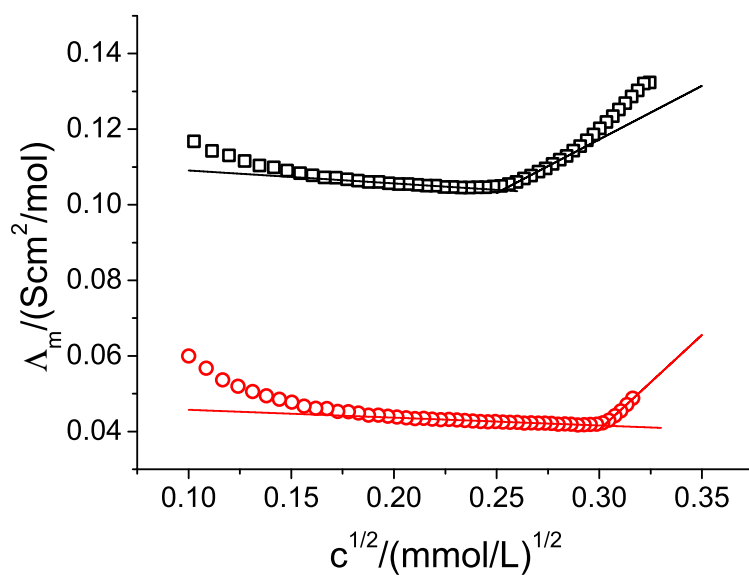

Figure S3: Determination of the cmc by conductivity measurements on the system TDMAO- $\text{C}_5\text{F}_{11}\text{CO}_2\text{Li}$  at  $\alpha(\text{TDMAO}) = 0.7$   $\square$  and  $\alpha(\text{TDMAO}) = 0.9$   $\circ$

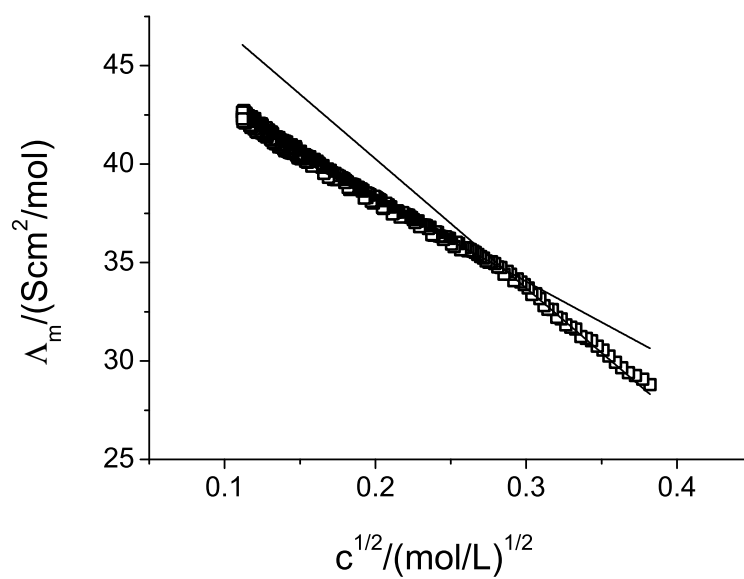

Figure S4: Determination of the cmc by conductivity measurements on the system TDMAO- $\text{C}_6\text{F}_{13}\text{CO}_2\text{Li}$  at  $\alpha(\text{TDMAO}) = 0$  □

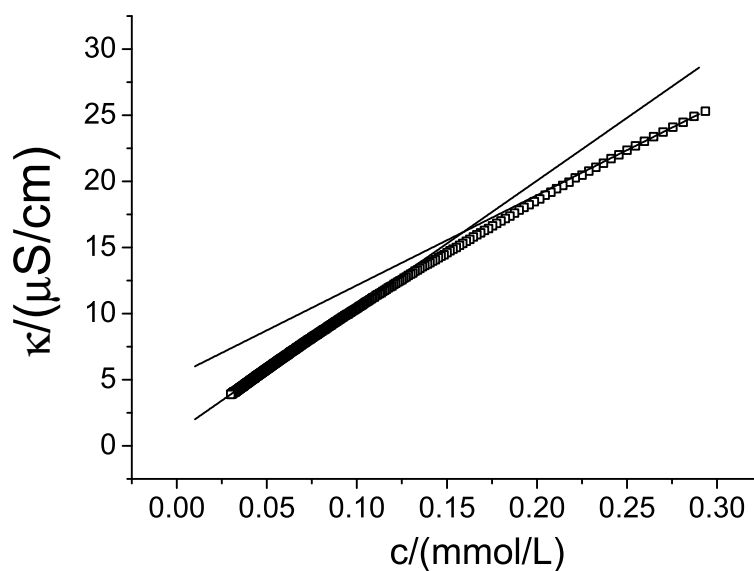

Figure S5: Determination of the cmc by conductivity measurements on the system TDMAO- $\text{C}_6\text{F}_{13}\text{CO}_2\text{Li}$  at  $\alpha(\text{TDMAO}) = 0.1$  □

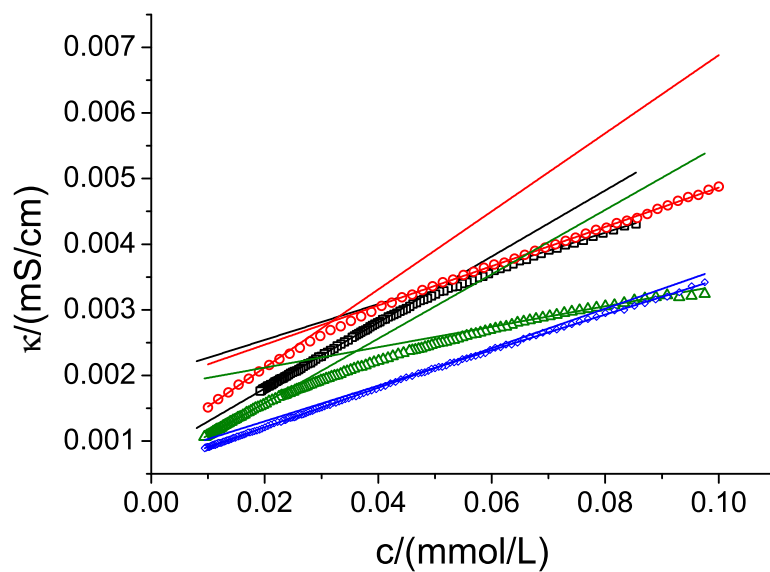

Figure S6: Determination of the cmc by conductivity measurements on the system TDMAO- $C_6F_{13}CO_2Li$  at  $\alpha(\text{TDMAO}) = 0.3$   $\square$ ,  $\alpha(\text{TDMAO}) = 0.4$   $\circ$ ,  $\alpha(\text{TDMAO}) = 0.5$   $\triangle$ , and  $\alpha(\text{TDMAO}) = 0.7$   $\diamond$

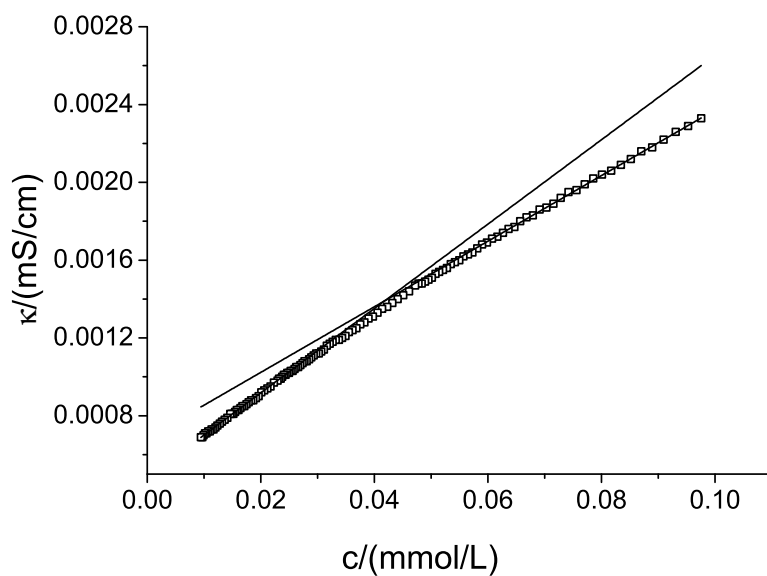

Figure S7: Determination of the cmc by conductivity measurements on the system TDMAO- $C_6F_{13}CO_2Li$  at  $\alpha(\text{TDMAO}) = 0.9$   $\square$

## Phase Behaviour

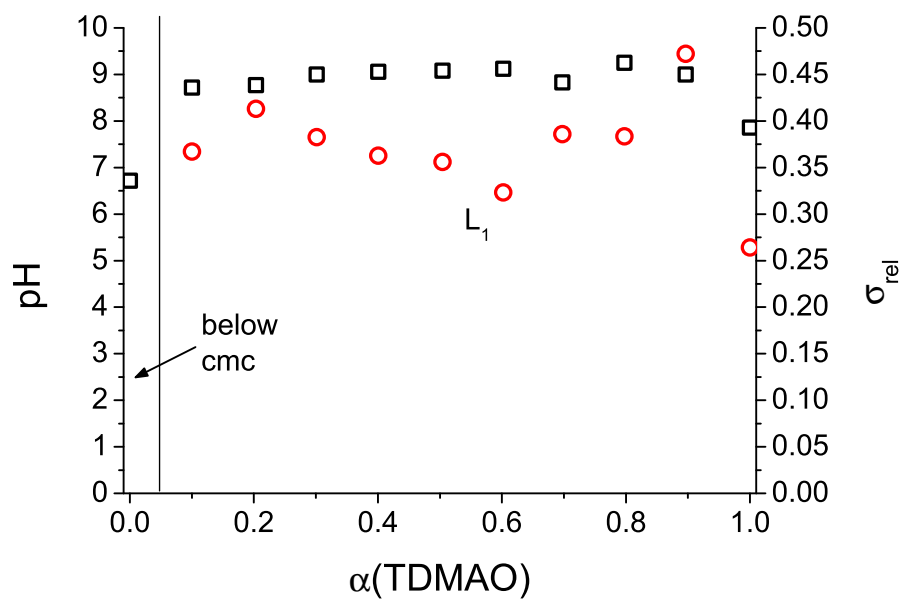

Figure S8: pH  $\square$  and polydispersity index ( $\sigma_{rel}$ ) from DLS  $\circ$  as a function of the molar ratio of the TDMAO ( $\alpha(\text{TDMAO})$ ) in the mixture TDMAO/ $\text{C}_5\text{F}_{11}\text{CO}_2\text{Li}$  at  $50\text{mM}$  total concentration ( $T = 25^\circ\text{C}$ )

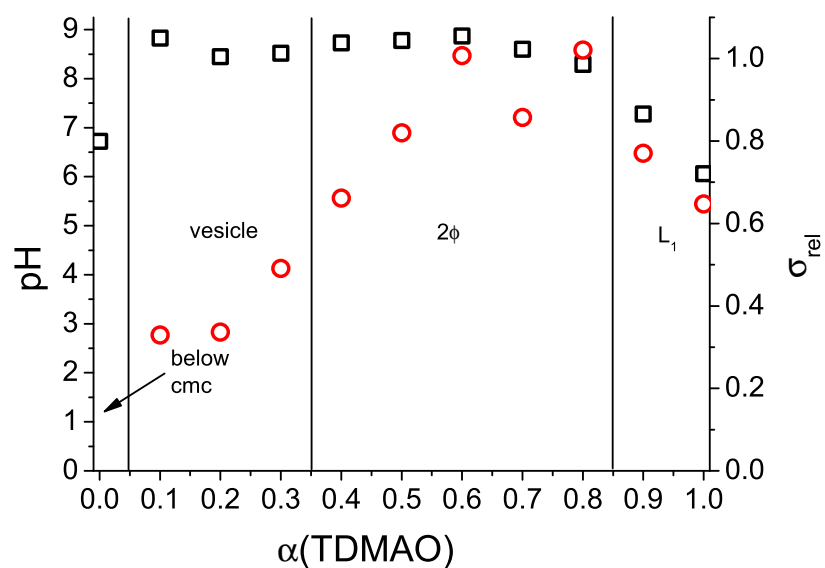

Figure S9: pH  $\square$  and polydispersity index ( $\sigma_{rel}$ ) determined by DLS measurements  $\circ$  of the system TDMAO/HCl/ $C_5F_{11}CO_2Li$  at  $50mM$  total concentration ( $T = 25^\circ C$ ) as a function of the molar ratio of the TDMAO ( $\alpha(TDMAO)$ )

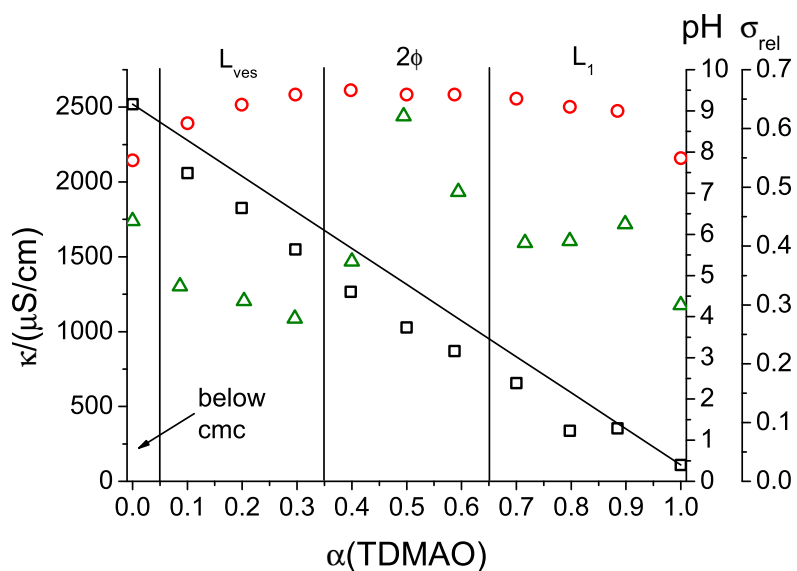

Figure S10: Phase behaviour and corresponding conductivity ( $\kappa$ )  $\square$ , pH  $\circ$ , and polydispersity index  $\triangle$  determined from cumulant analysis of the system TDMAO/ $C_6F_{13}CO_2Li$  at a total concentration of  $50mM$  ( $T = 25^\circ C$ ) as a function of the molar ratio of the TDMAO ( $\alpha(TDMAO)$ )

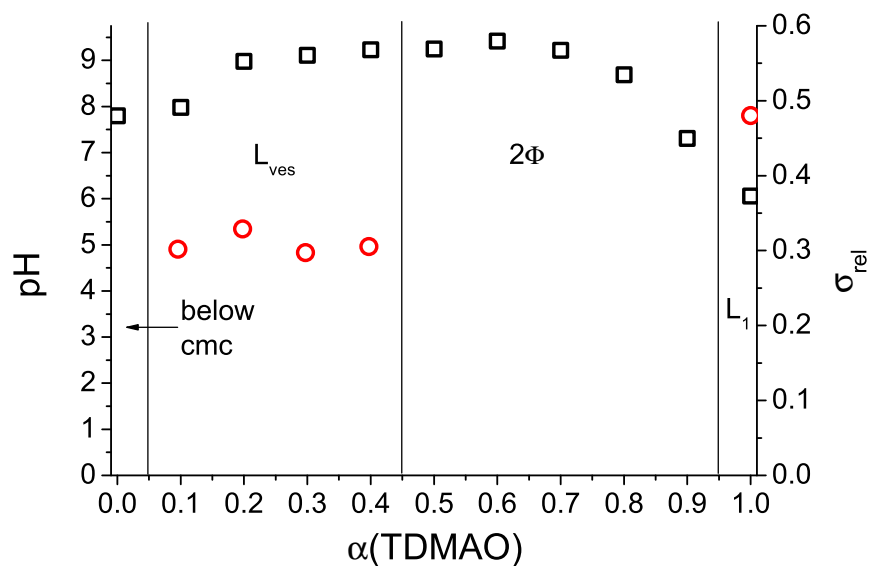

Figure S11: pH  $\square$  and polydispersity index ( $\sigma_{rel}$ ) determined by DLS measurements  $\circ$  of the system TDMAO- $\text{C}_6\text{F}_{13}\text{CO}_2\text{Li-HCl}$  with  $c(\text{HCl})/c(\text{TDMAO}) = 0.1$  at a constant total concentration of 50 mM ( $T = 25^\circ\text{C}$ ) as a function of the molar ratio of the TDMAO ( $\alpha(\text{TDMAO})$ )

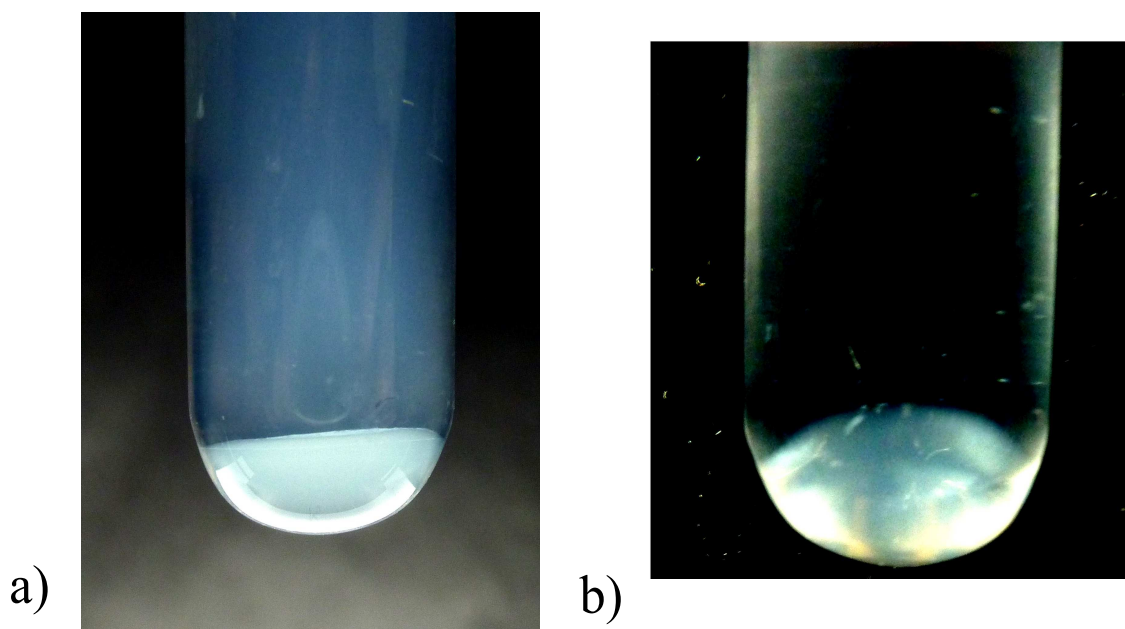

Figure S12: Photo of a mixture of TDMAO- $\text{C}_6\text{F}_{13}\text{CO}_2\text{Li}$  with 50mM and  $\alpha(\text{TDMAO}) = 0.5$ , sample is between polarization filters in photo b)

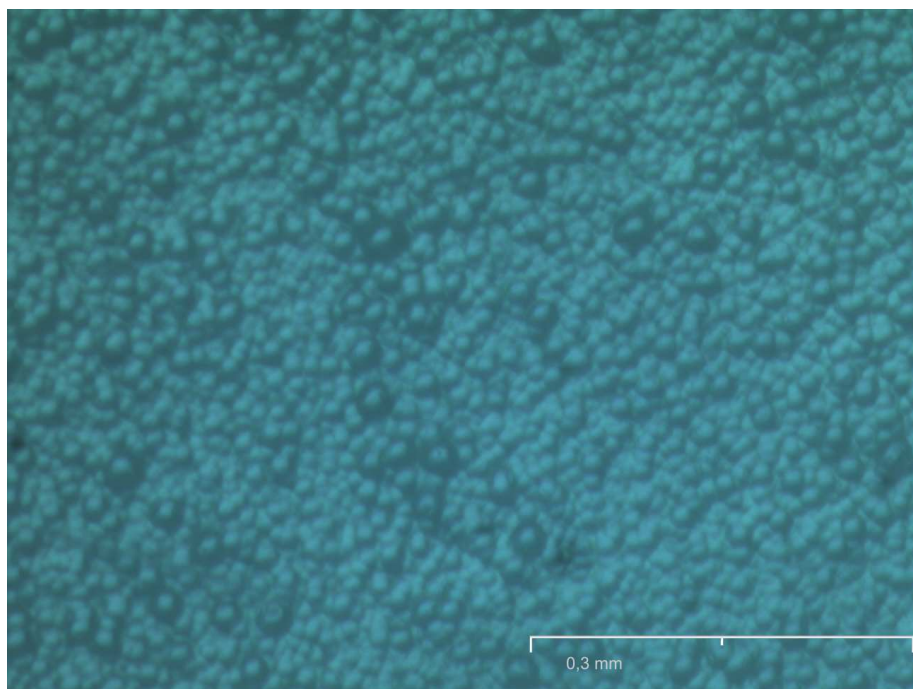

Figure S13: Photo of a mixture of TDMAO-C<sub>6</sub>F<sub>13</sub>CO<sub>2</sub>Li with 50mM and  $\alpha(\text{TDMAO}) = 0.5$  under a microscope with a tenfold magnification

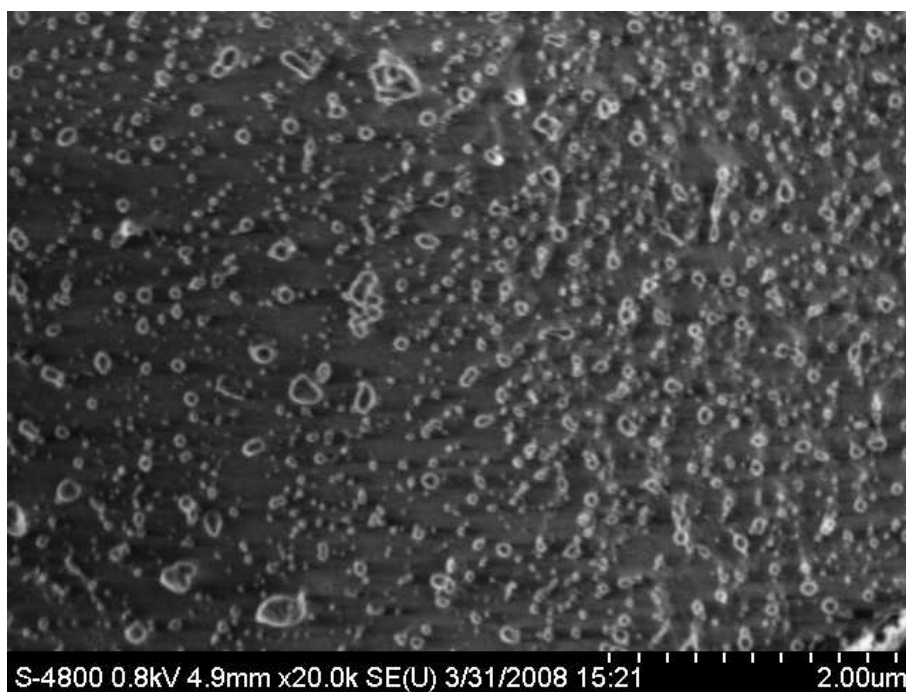

Figure S14: Cryo-SEM micrograph of a mixture of TDMAO-C<sub>6</sub>F<sub>13</sub>CO<sub>2</sub>Li with 50mM and  $\alpha(\text{TDMAO}) = 0.2$ ; mostly vesicles with a radius of 50nm are formed beside large objects of radii up to 300nm



## DLS-measurements

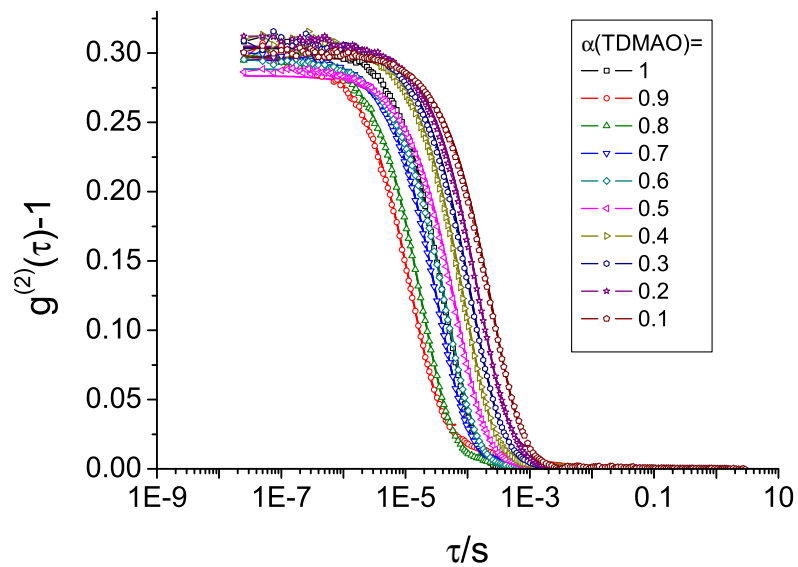

Figure S15: Normalised intensity autocorrelation functions of the DLS measurements (symbols) and cumulant analysis (lines) on the system TDMAO- $\text{C}_5\text{F}_{11}\text{CO}_2\text{Li}$  with a total surfactant concentration of  $50\text{mM}$  at a temperature of  $25^\circ\text{C}$

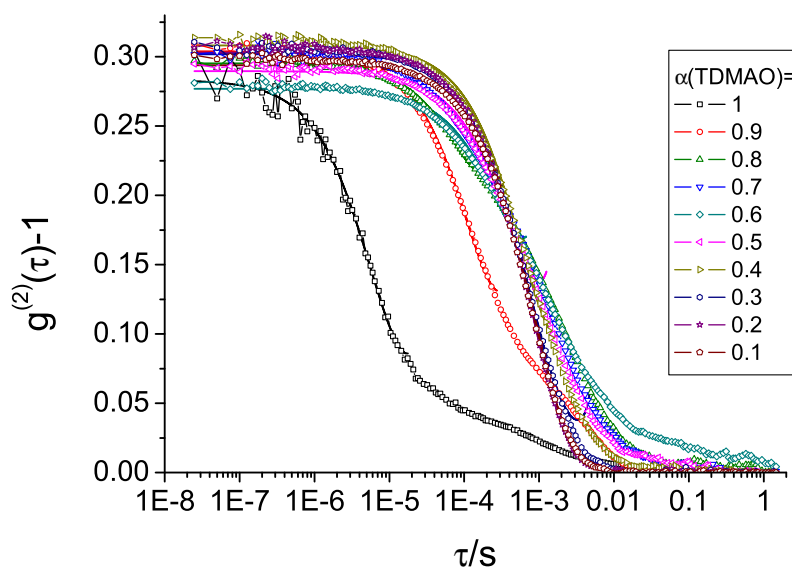

Figure S16: Normalised intensity autocorrelation functions of the DLS measurements (symbols) and cumulant analysis (lines) on the system TDMAO- $\text{C}_5\text{F}_{11}\text{CO}_2\text{Li}$ -HCl with a total surfactant concentration of  $50\text{mM}$  and a HCl-concentration of  $c(\text{HCl}) = 0.1 \cdot c(\text{TDMAO})$  at a temperature of  $25^\circ\text{C}$

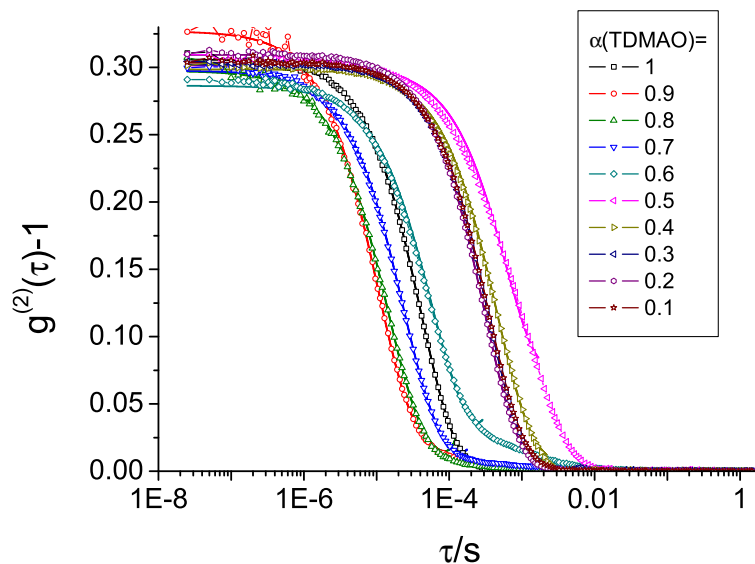

Figure S17: Normalised intensity autocorrelation functions of the DLS measurements (symbols) and cumulant analysis (lines) on the system TDMAO- $\text{C}_6\text{F}_{13}\text{CO}_2\text{Li}$  (0.59:0.41) with a total surfactant concentration of  $50\text{mM}$  at a temperature of  $25^\circ\text{C}$

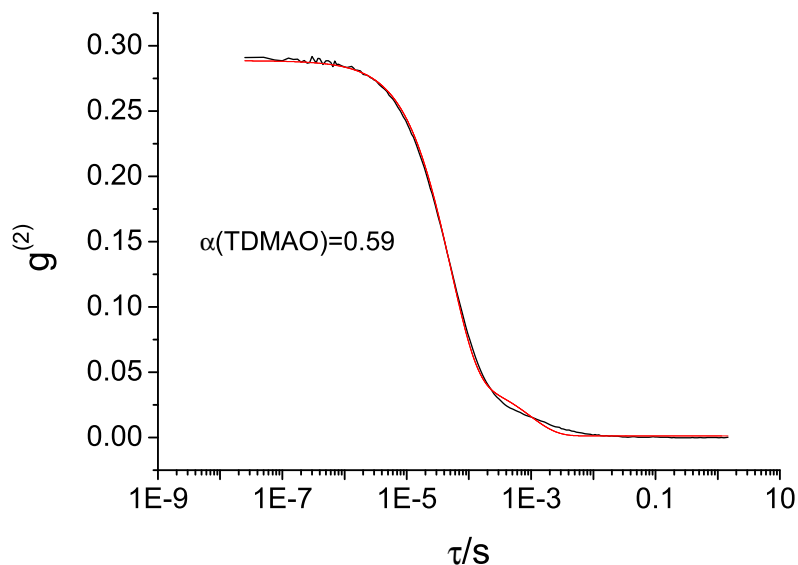

Figure S18: Normalised intensity autocorrelation functions of the DLS measurement (symbols) and bi-exponential fit (lines) on the system TDMAO-C<sub>6</sub>F<sub>13</sub>CO<sub>2</sub>Li (0.59:0.41) with a total surfactant concentration of 50mM at a temperature of 25°C

| $\alpha(\text{TDMAO})$ | $R_{h,cumu.}/nm$ | $PDI$ | $\eta/mPas$ | $R_{h1,biexp.}/nm$ | $R_{h2,biexp.}/nm$ | $\alpha(\text{TDMAO})$ | $R_{cond.}/nm$ |
|------------------------|------------------|-------|-------------|--------------------|--------------------|------------------------|----------------|
| 1.00                   | 7                | 0.3   | 1.16        |                    |                    | 1.00                   |                |
| 0.90                   | 2                | 0.44  | 3.54        |                    |                    | 0.88                   |                |
| 0.80                   | 2                | 0.41  | 2.84        |                    |                    | 0.80                   |                |
| 0.72                   | 4                | 0.41  | 13.78       |                    |                    | 0.70                   |                |
| 0.59                   | 10               | 0.49  | 23.55       | 9                  | 164                | 0.59                   | 91             |
| 0.49                   | 129              | 0.62  | 15.31       |                    |                    | 0.50                   | 97             |
| 0.40                   | 78               | 0.37  | 10.67       |                    |                    | 0.40                   | 87             |
| 0.30                   | 60               | 0.28  | 3.27        |                    |                    | 0.30                   | 67             |
| 0.20                   | 52               | 0.31  | 1.44        |                    |                    | 0.20                   | 52             |
| 0.09                   | 59               | 0.33  | 0.98        |                    |                    | 0.10                   | 50             |
| 0.00                   |                  |       | 0.96        |                    |                    | 0.00                   |                |

Table S1: hydrodynamic Radii  $R_h$  determined from cumulant analysis and from biexponentiell fits, polydispersity index  $PDI$  determined from cumulant analysis, vesicle radius  $R$  determined from conductivity measurements and viscosity  $\eta$  as a function of the molar fraction  $a$  of the TDMAO in the system TDMAO-C<sub>6</sub>F<sub>13</sub>CO<sub>2</sub>Li ( $T = 25^\circ C$ )

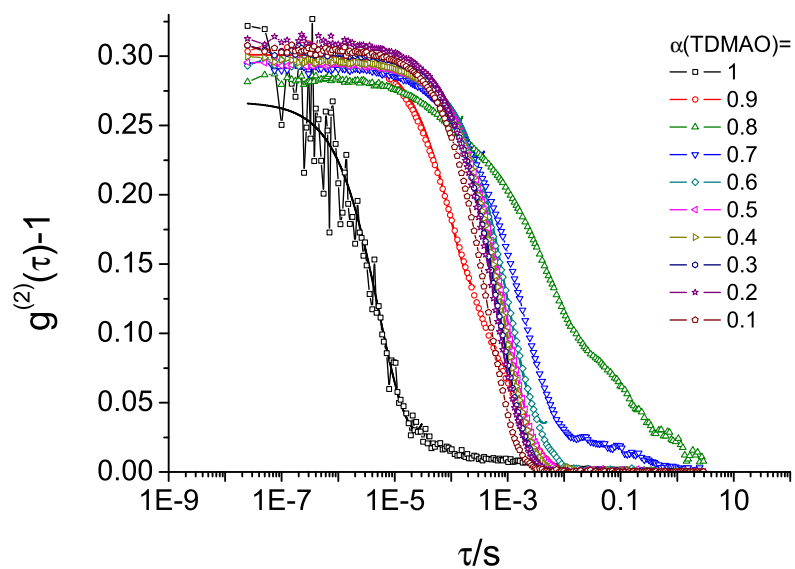

Figure S19: Normalised intensity autocorrelation functions of the DLS measurements and cumulant analysis on the system TDMAO- $C_6F_{13}CO_2Li$ -HCl with a total surfactant concentration of  $50mM$  and a HCl-concentration of  $c(\text{HCl}) = 0.1 \cdot c(\text{TDMAO})$  at a temperature of  $25^\circ C$

## Small Angle Neutron Scattering (SANS)

The scattering length density of the mixed material  $SLD_{particle}$  is a volume fraction ( $\phi_A$  and  $\phi_B$ ) weighted sum of the scattering length densities  $SLD_A$  and  $SLD_B$  of the components A and B. The scattering length density contrast  $\Delta SLD$  is the difference between the scattering length density of the particles  $SLD_{particle}$  and the medium  $SLD_{D_2O}$ .

$$\Delta SLD = SLD_{D_2O} - (\phi_A SLD_A + \phi_B SLD_B) \quad (S1)$$

The scattering intensity  $I_{cyl}(q)$  for monodisperse cylinders or discs with the form factor  $P_{cylinder}(q)$ , the length  $L$ , the radius  $R_{cyl}$ , the volume fraction of the scattering material  $\phi_{amph}$  and the scattering contrast compared to the surrounding medium  $\Delta SLD$  is given by:

$$P_{cyl}(q, R_{cyl}, L) = 4 \int_0^{\pi/2} \frac{\sin\left(\frac{qL}{2} \cos(\theta)\right)}{\frac{qL}{2} \cos(\theta)} \cdot \frac{J_1(qR_{cyl} \sin(\theta))}{(qR_{cyl} \sin(\theta))^2} d\theta \quad (S2)$$

$$I_{cyl}(q, R_{cyl}, L) = \frac{\phi_{amph}}{V_{cyl}(R_{cyl}, L)} \cdot \Delta SLD^2 \cdot V_{cyl}^2(R_{cyl}, L) \cdot P_{cyl}^2(q, R_{cyl}, L) \quad (S3)$$

$$\text{with } V_{cyl}(R_{cyl}, L) = \pi R_{cyl} L$$

where  $J_1$  is the Bessel function of the first order.

That leads to the following scattering intensity for the micelles with a log-normal distributed length  $L$  for cylindrical micelles:

$$I_{cyl}(q, R_{cyl}, L_0, \sigma) = \phi_{amph} \cdot \frac{\int_0^\infty \text{LogNorm}(L, L_0, \sigma) \cdot \Delta SLD^2 \cdot V_{cyl}^2(R_{cyl}, L) \cdot P_{cyl}^2(q, R_{cyl}, L) dL}{\int_0^\infty \text{LogNorm}(L, L_0, \sigma) \cdot V_{cyl}(R_{cyl}, L) dL} \quad (S4)$$

The log-normal distribution of a parameter  $t$  is given as:

$$\text{LogNorm}(t, \mu_L, \sigma_L) = \frac{1}{t\sqrt{2\pi}\sigma_L} \exp\left(\frac{-(\ln(t) - \mu_L)^2}{2\sigma_L^2}\right) \quad (S5)$$

The parameters  $\mu_L$  and  $\sigma_L$  are linked to the mean  $\mu$  of the distribution and the standard deviation  $\sigma$  which is identical to the polydispersity index  $PDI$  and throughout the text named polydispersity:

$$\sigma_L = \sqrt{\ln(\sigma + 1)} \quad (S6)$$

$$\mu_L = \ln(\mu) - \frac{\sigma_L^2}{2} \quad (S7)$$

For polydisperse vesicles (spherical shells) with a log-normal distributed intermediate radius  $R$ , a mean radius of  $R_0$  and a relative standard deviation  $\sigma$  the scattering intensity is given by:

$$P_{vesicle}(q, R) = \Delta SLD(f(q, R_{out}(R)) - f(q, R_{in}(R))) \quad (S8)$$

$$\text{with } f(q, R) = 4\pi R^3 \cdot \frac{\sin(qR) - qR \cos(qR)}{(qR)^3}$$

$$I_{vesicle}(q, R_0, \sigma) = \phi_{amph} \cdot \frac{\int_0^\infty \text{LogNorm}(R, R_0, \sigma) P_{vesicle}^2(q, R) dR}{\int_0^\infty \text{LogNorm}(R, R_0, \sigma) \cdot V_{shell}(R) dR} \quad (S9)$$

$$\text{with } V_{shell}(R) = \frac{4\pi}{3} (R_{out}^3(R) - R_{in}^3(R))$$

with  $R_{out} = R + d/2$  and  $R_{in} = R - d/2$ .

The RPA structure factor for electrostatic repulsion  $S(q)$  is described by eqn (S10) with the effective radius  $R_{eff}$  and the surface potential  $\zeta$  as fit parameters and the inverse Debye screening length  $k_D$ , the Boltzmann constant  $k_B$ , the temperature  $T$  and the dielectric constant of the medium, here water,  $\epsilon$  as constant parameters.

$$S(q) = \frac{1}{1 - nC(q)} \quad (S10)$$

$$nC_0(q) = \left[ A(\sin(x) - x \cos(x)) + B \left[ \left( \frac{2}{x^2} - 1 \right) x \cos(x) + 2 \sin(x) - \frac{2}{x} \right] - \frac{\phi_{eff} A}{2} \left[ \frac{24}{x^3} + 4 \left( 1 - \frac{6}{x^2} \right) \sin(x) - \left( 1 - \frac{12}{x^2} + \frac{24}{x^4} \right) x \cos(x) \right] \right] x^{-3} \quad (S11)$$

with  $x = 2qR_{eff}$

$$nC(q) = nC_0(q) - 48 \frac{\phi_{eff} \pi \epsilon R_{eff} \zeta^2 (x \cos(x) + 2k_D R_{eff} \sin(x))}{k_B T x (x^2 + 4k_D^2 R_{eff}^2)} \quad (S12)$$

with the factors

$$A = -24\phi_{eff} \frac{(1 + 2\phi_{eff})^2}{(1 - \phi_{eff})^4} \quad \text{and} \quad B = 36\phi_{eff}^2 \frac{(2 + \phi_{eff})^2}{(1 - \phi_{eff})^4}$$

The effective volume fraction of the particles  $\phi_{eff}$  is calculated from the particle number density  $N_V$  which is determined from the form factor.

$$\phi_{eff} = N_V \pi \frac{4}{3} R_{eff}^3 \quad (S13)$$

The particle number density  $N_V$  is described for the form factor as well as for the structure factor by eqn (S14).

$$N_V = \frac{\phi_{amph}}{V_{aggregate}} \quad (S14)$$

In the case of polydisperse particles with a normalised distribution  $dist$  of a parameter  $t$  the particle number density is described by eqn (S15).

$$N_V = \frac{\phi_{amph}}{\int_0^\infty dist(t, t_0, \sigma) \cdot V_{aggregate}(t) dt} \quad (S15)$$

The volume of the aggregates  $V_{aggregate}$  being the volume of scattering material in a single aggregate. For vesicles that would be only the vesicle shell. The volume fraction of the scattering material  $\phi_{amph}$  is calculated from the total concentration of amphiphile  $c_{tot}$  and the molar mass  $M_i$  and the density  $\rho_i$  of the amphiphilic components i:

$$\phi_{amph} = c_{tot} \cdot \sum_i \left( \frac{M_i}{\rho_i} \right) \quad (S16)$$

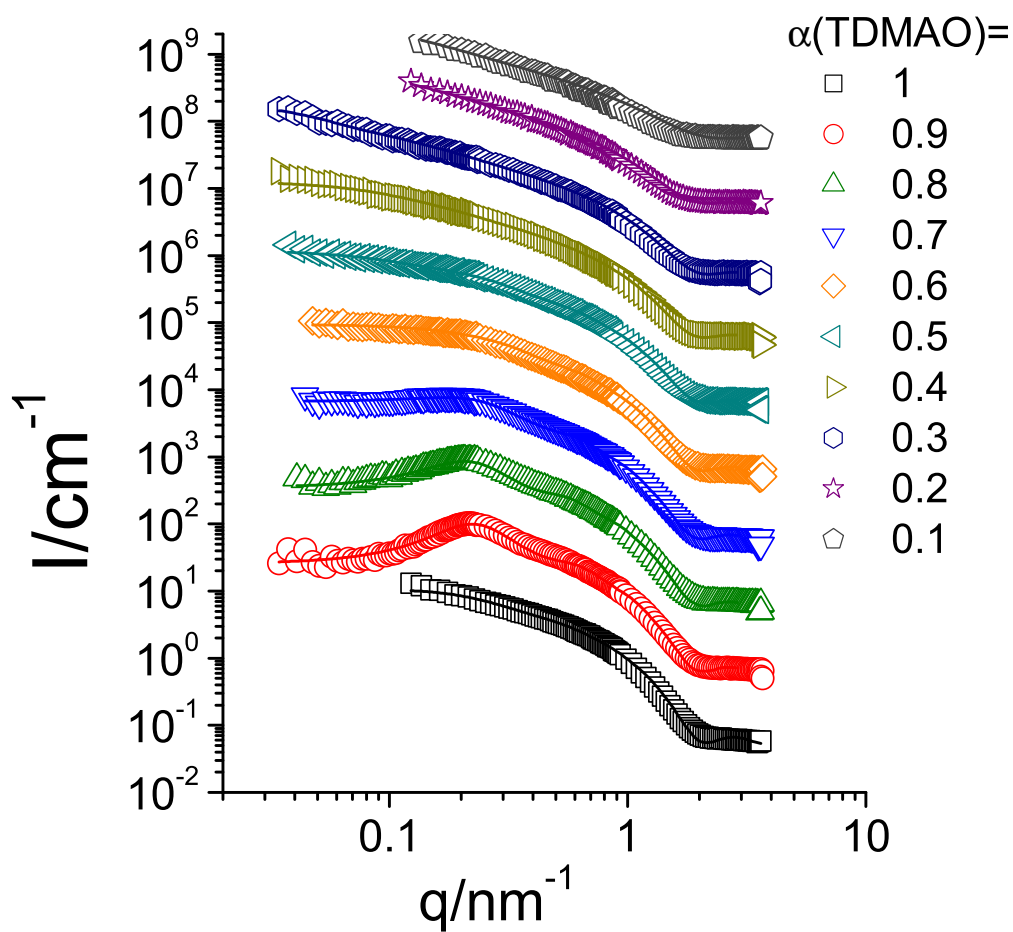

Figure S20: Small Angle Neutron Scattering (SANS) measurements of mixtures of TDMAO- $\text{C}_5\text{F}_{11}\text{CO}_2\text{Li}$ , (50 mM, 25°C, at  $\alpha(\text{TDMAO}) = 0$  no measurement is shown since here one is below the *cmc*, data are multiplied by multiples of 10 for clarification)

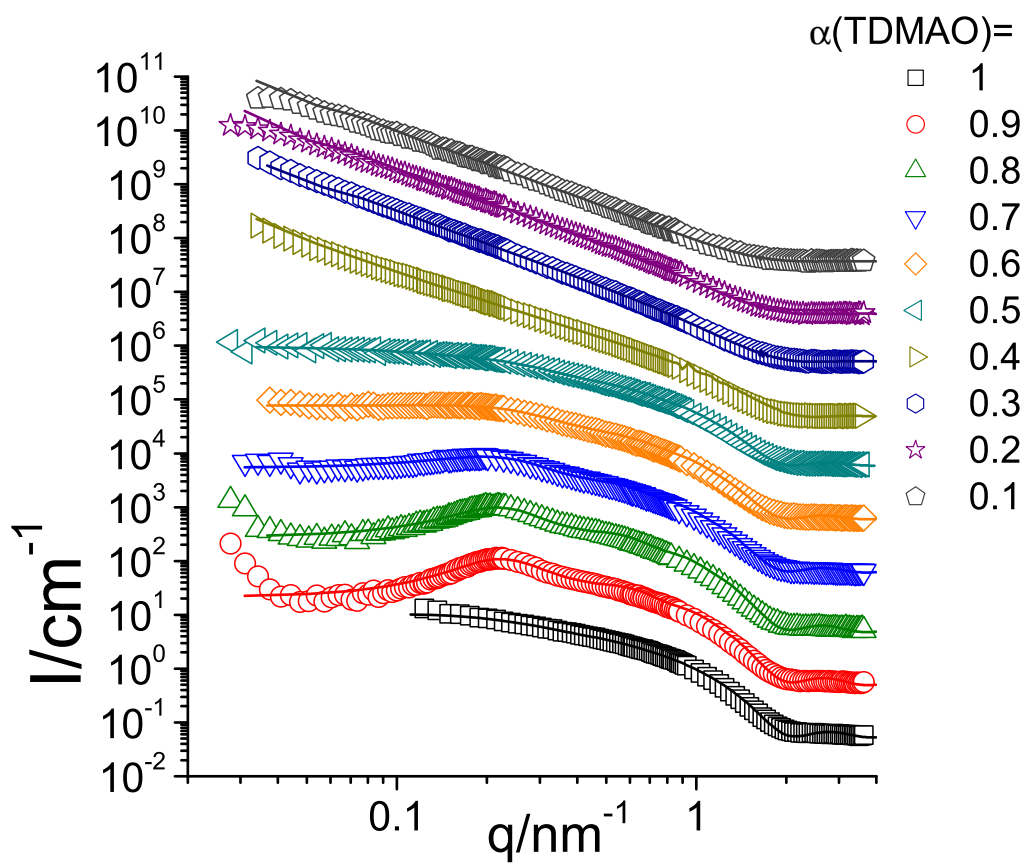

Figure S21: Small Angle Neutron Scattering (SANS) measurements of mixtures of TDMAO- $\text{C}_6\text{F}_{13}\text{CO}_2\text{Li}$ , (50 mM, 25°C, at  $\alpha(\text{TDMAO}) = 0$  no measurement is shown since here one is below the *cmc*, data are multiplied by multiples of 10 for clarification)



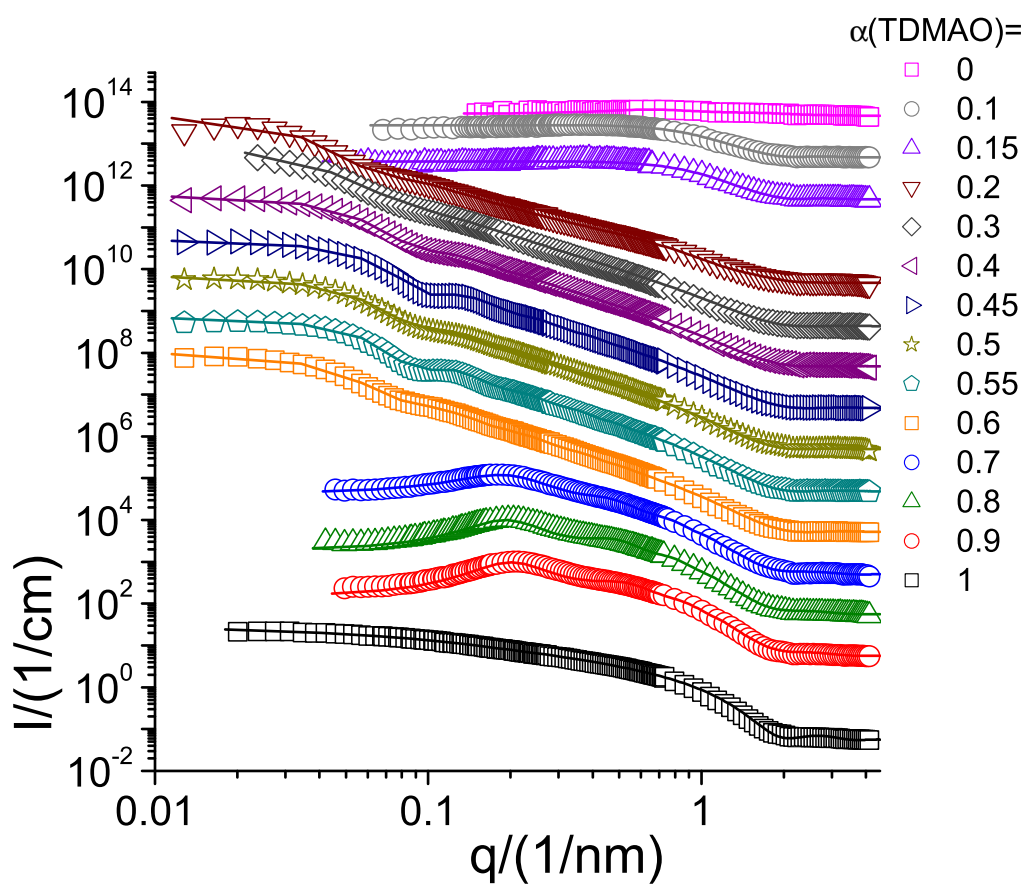

Figure S22: Small Angle Neutron Scattering (SANS) measurements of mixtures of TDMAO- $\text{C}_7\text{F}_{15}\text{CO}_2\text{Li}$ , (50 mM, 25°C, at  $\alpha(\text{TDMAO}) = 0$  no measurement is shown since here one is below the *cmc*, data are multiplied by multiples of 10 for clarification)

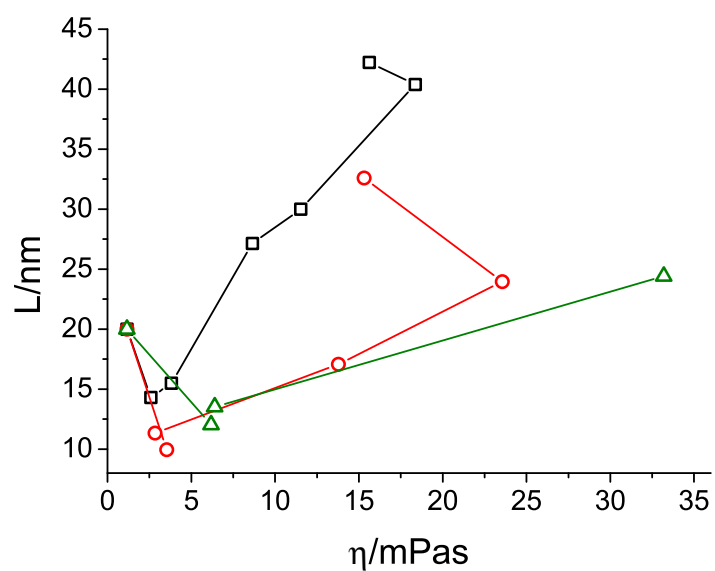

Figure S23: Dependency of the length ( $L$ ) of the micelles derived from SANS-measurements on the viscosity ( $\eta$ ) of the sample in the system TDMAO- $C_nF_{2n+1}CO_2Li$  with a constant total concentration of  $50mM$  at  $25^\circ C$ ;  $n=5$   $\square$ ,  $n=6$   $\circ$ ,  $n=7$   $\triangle$
